# Supplementary material
Source: MDPI journal article supplement (https://www.mdpi.com/2673-933X/4/2/12)
Supplement: s1 [file s1]

# GrowSafe Steers

June 2023

|                    | 1600#  | 2000#  |
|--------------------|--------|--------|
| Corn Silage        | 972.32 | 1215.4 |
| Grass<br>Baleage   | 372.64 | 465.8  |
| Cracked<br>Corn    | 183.68 | 229.6  |
| Meal<br>Supplement | 66.4   | 83     |
| Mineral            | 4.96   | 6.2    |
